# Supplementary material for: The intervention effect of licorice ind-galactose induced aging rats by regulating the taurine metabolic pathway
Source: Royal Society of Chemistry journal article supplement (doi:10.1039/c8fo00740c), 2018-01-01
Supplement: c8fo00740c1.pdf [file c8fo00740c1.pdf]

1

**Supplementary information**

**2 Table S1.** <sup>1</sup>H NMR assignments of major metabolites in serum and urine of rats.

| No. | Metabolites           | Moieties                                                               | δ <sup>1</sup> H/(multiplicity) | Samples |
|-----|-----------------------|------------------------------------------------------------------------|---------------------------------|---------|
| 1   | Butyrate              | CH <sub>3</sub>                                                        | 0.94(t)                         | U.      |
| 2   | Leucine               | δCH <sub>3</sub> , γCH                                                 | 0.96(t), 1.71(m)                | S.      |
| 3   | Isoleucine            | δCH <sub>3</sub> , γCH <sub>3</sub> , βCH                              | 0.94(t), 1.01(d), 2.01(m)       | S.      |
| 4   | Valine                | αCH, βCH                                                               | 0.99(d), 2.27(m)                | S.      |
| 5   | 3-hydroxybutyrate     | γCH <sub>3</sub>                                                       | 1.20(d)                         | S.      |
| 6   | Lactate               | αCH, βCH <sub>3</sub>                                                  | 1.33(d), 4.12(q)                | S.U     |
| 7   | Threonine             | γCH <sub>3</sub> , αCH                                                 | 1.33(d), 3.60(q)                | U       |
| 8   | Alanine               | βCH <sub>3</sub>                                                       | 1.48(d)                         | S.U     |
| 9   | Acetate               | CH <sub>3</sub>                                                        | 1.92(s)                         | S.U     |
| 10  | 2-hydroxygluteic acid | -                                                                      | 1.97(s)                         | U       |
| 11  | N-acetylaspartic acid | -                                                                      | 2.03(s)                         | U       |
| 12  | Glutamate             | αCH, βCH <sub>2</sub> , γCH <sub>2</sub>                               | 2.08(m), 2.35(m), 3.75(m)       | S.      |
| 13  | OAG <sup>b</sup>      | CH <sub>3</sub>                                                        | 2.14(s)                         | S       |
| 14  | Acetone               | CH <sub>3</sub>                                                        | 2.23(s)                         | S       |
| 15  | Pyruvate              | CH <sub>3</sub>                                                        | 2.37(s)                         | S.      |
| 16  | Succinate             | CH <sub>2</sub>                                                        | 2.41(s)                         | U       |
| 17  | α-ketoglutarate       | βCH <sub>2</sub> , γCH <sub>2</sub>                                    | 2.44(t), 3.02(t)                | U       |
| 18  | Citrate               | CH <sub>2</sub> (1/2), CH <sub>2</sub> (1/2)                           | 2.55(d), 2.67(d)                | U       |
| 19  | Methylamine           | CH <sub>3</sub>                                                        | 2.61(s)                         | S.U     |
| 20  | DMA                   | CH <sub>3</sub>                                                        | 2.72(s)                         | S.U     |
| 21  | Trimethylamine        | CH <sub>3</sub>                                                        | 2.85(s)                         | U       |
| 22  | Dimethylglycine       | CH <sub>3</sub>                                                        | 2.92(s)                         | U       |
| 23  | Creatine              | CH <sub>3</sub> , CH <sub>2</sub>                                      | 3.04(s), 3.95(s)                | S.U     |
| 24  | Creatinine            | CH <sub>3</sub> , CH <sub>2</sub>                                      | 3.05(s), 4.05(s)                | U       |
| 25  | Choline               | N(CH <sub>3</sub> ) <sub>3</sub> , N-CH <sub>2</sub>                   | 3.21(s), 4.06(t)                | S.      |
| 26  | PC                    | N(CH <sub>3</sub> ) <sub>3</sub>                                       | 3.22(s)                         | S.      |
| 27  | GPC                   | N(CH <sub>3</sub> ) <sub>3</sub>                                       | 3.23(s)                         | S.      |
| 28  | Phosphocholine        | N(CH <sub>3</sub> ) <sub>3</sub> , OCH <sub>2</sub> , NCH <sub>2</sub> | 3.23(s), 4.21(t), 3.61(t)       | S.      |
| 29  | TMAO <sup>b</sup>     | CH <sub>3</sub>                                                        | 3.25(s)                         | S       |
| 30  | Betaine               | CH <sub>3</sub> , CH <sub>2</sub>                                      | 3.27(s), 3.91(s)                | U.      |
| 31  | Scyllo-inositol       | CH                                                                     | 3.36(s)                         | S.U     |
| 32  | Glycerol              | half CH <sub>2</sub>                                                   | 3.56(dd)                        | S.      |
| 33  | Cystine               |                                                                        | 3.42(s)                         | S.U     |
| 34  | Taurine               | -CH <sub>2</sub> -S-, -CH <sub>2</sub> -NH <sub>2</sub>                | 3.27(t), 3.43(t)                | S.U     |
| 35  | Sucrose               |                                                                        | 4.22(d), 4.06(t)                | U       |
| 36  | Glycine               | CH <sub>2</sub>                                                        | 3.57(s)                         | S.U     |
| 37  | Phenylacetylglutamine |                                                                        | 3.60(s)                         | U       |
| 38  | Guanidoacetate        | CH <sub>2</sub>                                                        | 3.80(s)                         | U       |
| 39  | β-Glucose             | 1-CH                                                                   | 4.64(d)                         | S.U     |

|    |                      |                                          |                                              |     |
|----|----------------------|------------------------------------------|----------------------------------------------|-----|
| 40 | $\alpha$ -Glucose    | 1-CH                                     | 5.24(d,)                                     | S.U |
| 41 | Allantoin            |                                          | 5.38(s)                                      | S.U |
| 42 | Fumarate             | CH=CH                                    | 6.53(s)                                      | U   |
| 43 | Tyrosine             | 3or5-CH,2or6-CH                          | 6.90(d), 7.19(d)                             | S.  |
| 44 | Histidine            | 2-CH,4-CH                                | 7.10(s), 7.91(s)                             | S.  |
| 45 | Phenylalanine        | 2or6-CH,3or5-CH                          | 7.42(m) , 7.32(m)                            | S.  |
| 46 | Hippurate            | CH <sub>2</sub> , 3,5-CH, 4-CH, 2,6-CH   | 7.57(t), 7.65(t), 7.84(d)                    | U   |
| 47 | Xanthine             | CH                                       | 7.88(s)                                      | U   |
| 48 | Formate              | CH                                       | 8.46(s)                                      | S.U |
| 49 | Trigonerine          | 2-CH, 4-CH, 6-CH, 5-CH, CH <sub>3</sub>  | 9.12(s), 8.85(m), 8.83(dd), 8.19(m), 4.44(s) | U   |
| 50 | N-methylnicotinamide | CH <sub>3</sub> , 4-CH, 5-CH, 6-CH, 2-CH | 4.48(s), 8.19(m), 8.91(m), 8.97(d), 9.28(s)  | U   |

1

2

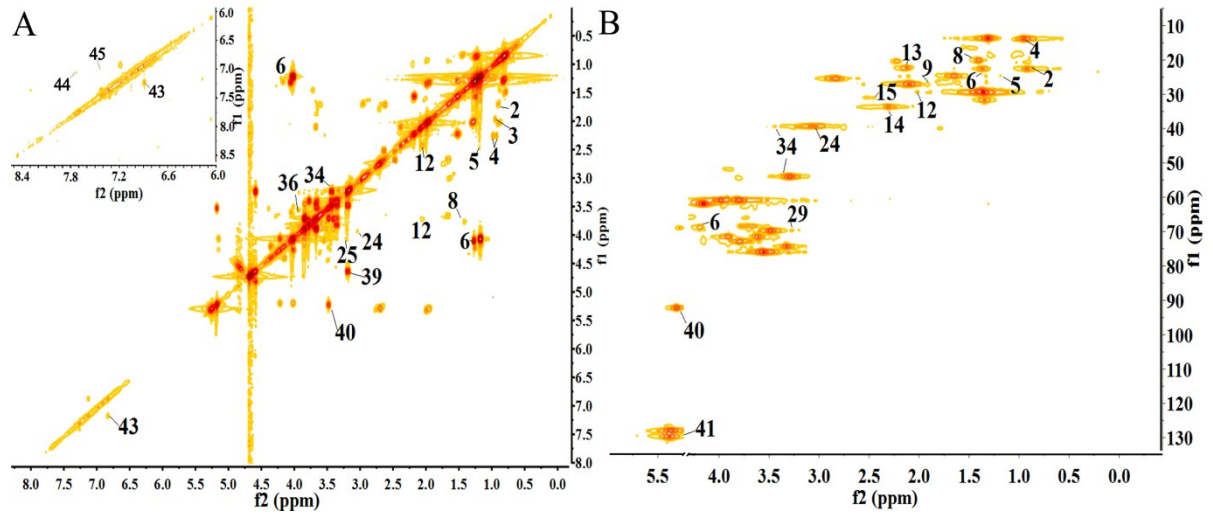

1

2 **Fig. S1.** (A)  $^1\text{H}$ - $^1\text{H}$  COSY spectrum of serum, (B)  $^1\text{H}$ - $^{13}\text{C}$  HSQC spectrum of serum.

3

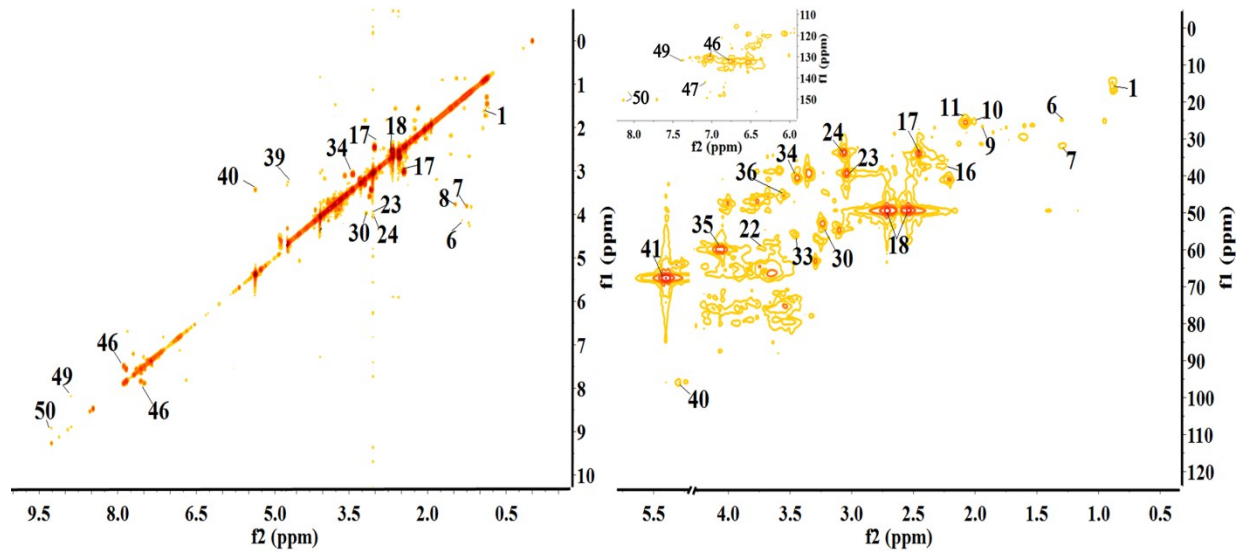

4

5 **Fig. S2.** (A)  $^1\text{H}$ - $^1\text{H}$  COSY spectrum of urine, (B)  $^1\text{H}$ - $^{13}\text{C}$  HSQC spectrum of urine.

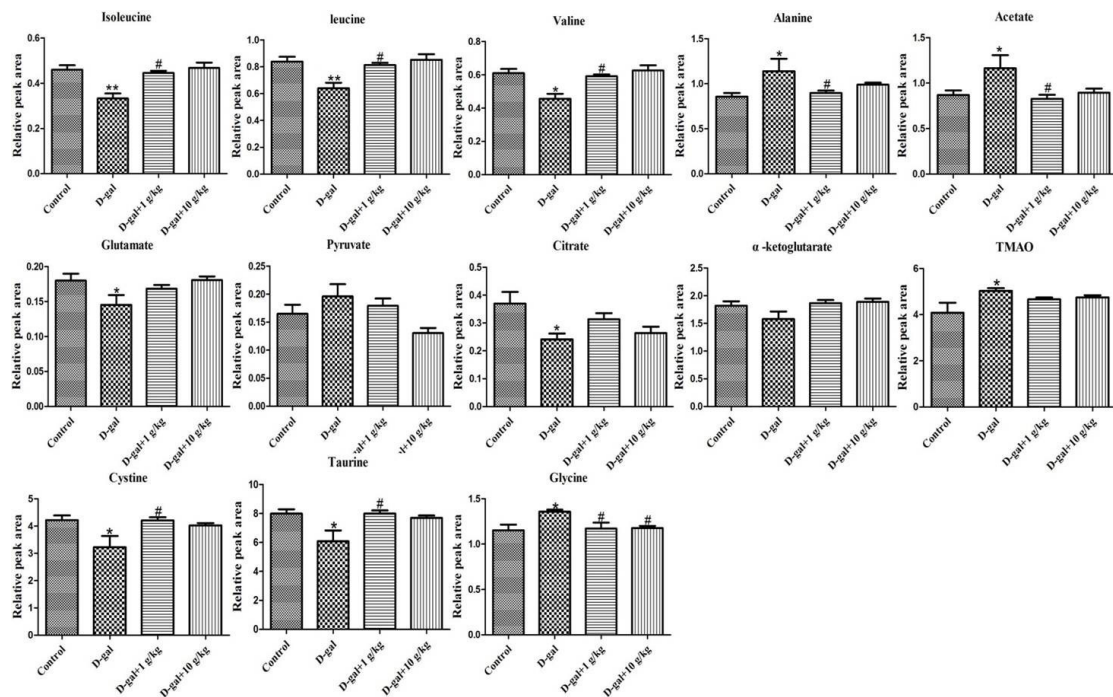

1

2 **Fig.S3** The relative peak area of differential metabolites in serum of rats. \* $p < 0.05$ , \*\* $p < 0.01$   
 3 compared with the control. # $p < 0.05$ , ## $p < 0.01$  compared with the model.

4

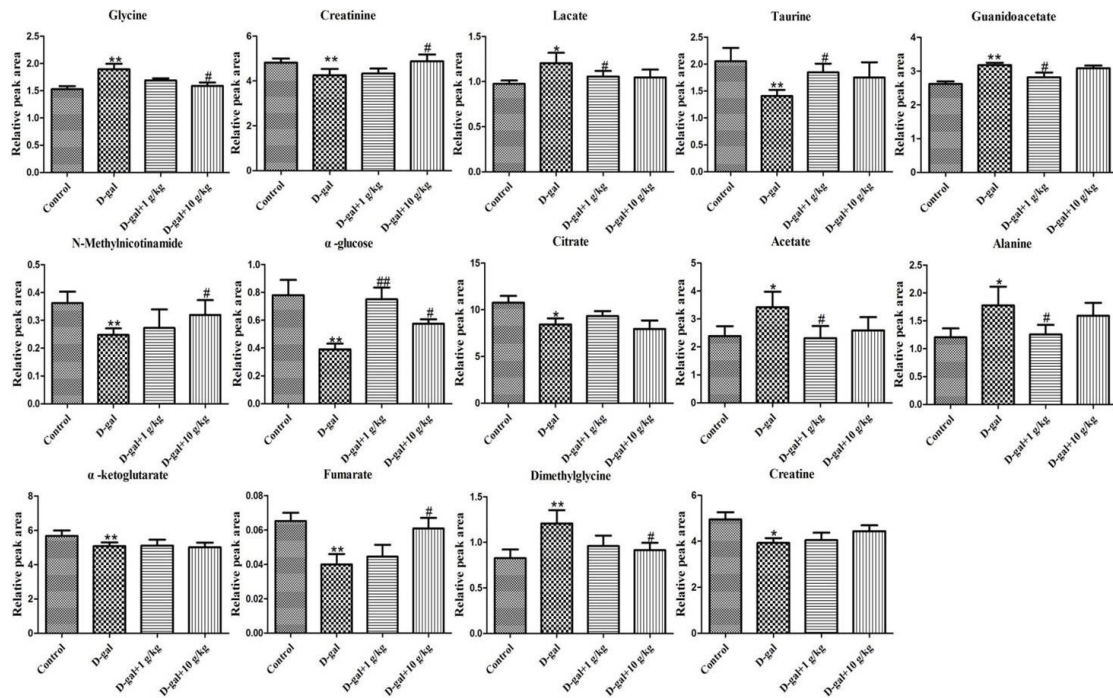

1

2 **Fig.S4** The relative peak area of differential metabolites in urine of rats. \* $p < 0.05$ , \*\* $p < 0.01$   
 3 compared with the control. # $p < 0.05$ , ## $p < 0.01$  compared with the model.

4
